# Supplementary material for: The Surgical Patient Routing Problem: A Central Planner Approach
Source: Atypon-hosted journal article supplement (doi:10.1287/ijoc.2016.0706), 2016-08-30
Supplement: ijoc.2016.0706-sm.pdf [file ijoc.2016.0706-sm.pdf]

Authors are encouraged to submit new papers to INFORMS journals by means of a style file template, which includes the journal title. However, use of a template does not certify that the paper has been accepted for publication in the named journal. INFORMS journal templates are for the exclusive purpose of submitting to an INFORMS journal and should not be used to distribute the papers in print or online or to submit the papers to another publication.

## Online Supplement to “The Surgical Patient Routing Problem: A Central Planner Approach”

Sepehr Nemati

Department of Industrial Engineering, University of Pittsburgh, Pittsburgh, Pennsylvania 15261,  
sen12@pitt.edu

Oleg V. Shylo

Department of Industrial and Systems Engineering, University of Tennessee, Knoxville, Tennessee 37996,  
oshylo@utk.edu

Oleg A. Prokopyev

Department of Industrial Engineering, University of Pittsburgh, Pittsburgh, Pennsylvania 15261,  
prokopyev@engr.pitt.edu

Andrew J. Schaefer

Department of Computational and Applied Mathematics, Rice University, Houston, Texas 77005,  
andrew.schaefer@rice.edu

**Table 5** Performance of the branch-and-price method under different algorithmic strategies. The reported solution times are in seconds.

| Class | Instance | SCD    |       |         | MCD       |          |               | SCH        |           |                | MCH        |           |                |
|-------|----------|--------|-------|---------|-----------|----------|---------------|------------|-----------|----------------|------------|-----------|----------------|
|       |          | Nodes  | Depth | Time    | Nodes     | Depth    | Time          | Nodes      | Depth     | Time           | Nodes      | Depth     | Time           |
| P1    | 1        | 1      | 1     | 1.95    | 1         | 1        | 3.47          | 1          | 1         | 3.99           | 1          | 1         | <b>0.85</b>    |
|       | 2        | 32     | 7     | 25.57   | 10        | 4        | 12.63         | <b>17</b>  | <b>5</b>  | <b>9.61</b>    | 21         | 8         | 9.87           |
|       | 3        | 5      | 3     | 5.70    | 13        | 7        | 20.65         | 7          | 4         | 5.54           | <b>5</b>   | <b>3</b>  | <b>4.06</b>    |
|       | 4        | 3      | 2     | 1.43    | 3         | 2        | 2.08          | 5          | 3         | 3.46           | <b>3</b>   | <b>2</b>  | <b>0.70</b>    |
|       | 5        | 1      | 1     | 2.11    | 1         | 1        | 5.99          | 1          | 1         | 5.23           | <b>1</b>   | <b>1</b>  | <b>1.70</b>    |
|       | Average  | 8.40   | 2.80  | 7.35    | 5.60      | 3.00     | 8.96          | 6.20       | 2.80      | 5.57           | 6.20       | 3.00      | 3.44           |
| P2    | 1        | 1      | 1     | 15.79   | 1         | 1        | 10.35         | 1          | 1         | 6.63           | <b>1</b>   | <b>1</b>  | <b>4.38</b>    |
|       | 2        | 27     | 7     | 121.93  | 23        | 7        | 58.89         | <b>27</b>  | <b>7</b>  | <b>44.42</b>   | 65         | 9         | 184.37         |
|       | 3        | 35     | 11    | 153.23  | 33        | 7        | 100.98        | <b>25</b>  | <b>6</b>  | <b>41.56</b>   | 29         | 7         | 84.92          |
|       | 4        | 1      | 1     | 21.14   | 1         | 1        | 13.15         | 1          | 1         | 9.39           | <b>1</b>   | <b>1</b>  | <b>7.94</b>    |
|       | 5        | 1      | 1     | 18.04   | 1         | 1        | 9.24          | <b>1</b>   | <b>1</b>  | <b>7.38</b>    | 1          | 1         | 8.15           |
|       | Average  | 13.00  | 4.20  | 66.03   | 11.80     | 3.40     | 38.52         | 11.00      | 3.20      | 21.88          | 19.40      | 3.80      | 57.95          |
| P3    | 1        | 23     | 7     | 273.26  | <b>15</b> | <b>5</b> | <b>151.63</b> | 35         | 9         | 200.50         | 19         | 7         | 180.34         |
|       | 2        | 16     | 5     | 247.18  | 21        | 6        | 231.58        | 27         | 7         | 187.64         | <b>13</b>  | <b>5</b>  | <b>138.38</b>  |
|       | 3        | 1      | 1     | 34.29   | 1         | 1        | 32.14         | 1          | 1         | 12.52          | <b>1</b>   | <b>1</b>  | <b>10.21</b>   |
|       | 4        | 9      | 4     | 164.24  | 13        | 5        | 139.10        | <b>9</b>   | <b>4</b>  | <b>44.84</b>   | 13         | 5         | 133.17         |
|       | 5        | 61     | 11    | 555.59  | 37        | 8        | 275.01        | <b>53</b>  | <b>9</b>  | <b>183.46</b>  | 49         | 11        | 341.22         |
|       | Average  | 22.00  | 5.60  | 254.91  | 17.40     | 5.00     | 165.89        | 25.00      | 6.00      | 125.79         | 19.00      | 5.80      | 160.66         |
| P4    | 1        | 1      | 1     | 2.61    | 1         | 1        | 4.42          | 1          | 1         | 3.97           | <b>1</b>   | <b>1</b>  | <b>2.06</b>    |
|       | 2        | 75     | 9     | 50.84   | 131       | 12       | 129.39        | 95         | 10        | 59.38          | <b>91</b>  | <b>8</b>  | <b>50.61</b>   |
|       | 3        | 49     | 7     | 35.83   | 79        | 14       | 82.79         | <b>47</b>  | <b>14</b> | <b>21.58</b>   | 42         | 11        | 26.80          |
|       | 4        | 9      | 5     | 8.71    | 43        | 9        | 53.29         | <b>15</b>  | <b>7</b>  | <b>13.77</b>   | 73         | 10        | 46.86          |
|       | 5        | 55     | 11    | 44.72   | 39        | 11       | 64.57         | 47         | 10        | 45.04          | <b>49</b>  | <b>13</b> | <b>21.78</b>   |
|       | Average  | 37.80  | 6.60  | 28.54   | 58.60     | 9.40     | 66.89         | 41.00      | 8.40      | 28.75          | 51.20      | 8.60      | 29.62          |
| P5    | 1        | 1      | 1     | 20.78   | 1         | 1        | 15.92         | 1          | 1         | 7.29           | <b>1</b>   | <b>1</b>  | <b>6.26</b>    |
|       | 2        | 1      | 1     | 31.19   | 1         | 1        | 24.22         | 1          | 1         | 12.28          | <b>1</b>   | <b>1</b>  | <b>12.10</b>   |
|       | 3        | 1      | 1     | 18.62   | 1         | 1        | 15.16         | 1          | 1         | 8.19           | <b>1</b>   | <b>1</b>  | <b>7.34</b>    |
|       | 4        | 83     | 12    | 269.55  | 215       | 13       | 675.60        | <b>33</b>  | <b>7</b>  | <b>51.68</b>   | 57         | 7         | 142.77         |
|       | 5        | 267    | 16    | 985.47  | 233       | 17       | 816.57        | 253        | 17        | 474.07         | <b>91</b>  | <b>11</b> | <b>271.28</b>  |
|       | Average  | 70.60  | 6.20  | 265.12  | 90.20     | 6.60     | 309.49        | 57.80      | 5.40      | 110.70         | 30.20      | 4.20      | 87.95          |
| P6    | 1        | 41     | 7     | 438.07  | 55        | 9        | 815.41        | 73         | 10        | 522.48         | <b>47</b>  | <b>8</b>  | <b>447.29</b>  |
|       | 2        | 93     | 13    | 732.35  | 29        | 8        | 334.04        | <b>61</b>  | <b>9</b>  | <b>331.95</b>  | 93         | 13        | 589.90         |
|       | 3        | 27     | 9     | 242.91  | 47        | 8        | 415.68        | 28         | 9         | 202.65         | <b>21</b>  | <b>6</b>  | <b>189.98</b>  |
|       | 4        | 93     | 10    | 951.64  | 75        | 9        | 1028.71       | <b>87</b>  | <b>9</b>  | <b>588.34</b>  | 73         | 10        | 621.13         |
|       | 5        | 43     | 8     | 313.62  | 179       | 17       | 2047.19       | 49         | 10        | 274.96         | <b>27</b>  | <b>7</b>  | <b>135.10</b>  |
|       | Average  | 59.40  | 9.40  | 535.72  | 77.00     | 10.20    | 928.21        | 59.60      | 9.40      | 384.08         | 52.20      | 8.80      | 396.68         |
| P7    | 1        | 45     | 7     | 31.37   | 54        | 8        | 75.20         | 57         | 8         | 36.35          | <b>43</b>  | <b>7</b>  | <b>26.41</b>   |
|       | 2        | 1      | 1     | 3.64    | 1         | 1        | 8.07          | 1          | 1         | 5.27           | <b>1</b>   | <b>1</b>  | <b>1.36</b>    |
|       | 3        | 5      | 3     | 6.37    | 5         | 3        | 13.16         | 5          | 3         | 7.29           | <b>5</b>   | <b>3</b>  | <b>3.32</b>    |
|       | 4        | 5      | 3     | 4.30    | 7         | 4        | 12.27         | 7          | 4         | 7.99           | <b>5</b>   | <b>3</b>  | <b>2.78</b>    |
|       | 5        | 231    | 11    | 177.82  | 253       | 11       | 328.88        | <b>145</b> | <b>10</b> | <b>96.20</b>   | 177        | 11        | 117.95         |
|       | Average  | 57.40  | 5.00  | 44.70   | 64.00     | 5.40     | 87.52         | 43.00      | 5.20      | 30.62          | 46.20      | 5.00      | 30.36          |
| P8    | 1        | 443    | 15    | 1857.66 | 453       | 19       | 2393.41       | <b>350</b> | <b>21</b> | <b>1087.66</b> | 391        | 14        | 1492.91        |
|       | 2        | 3      | 2     | 26.49   | 11        | 4        | 70.34         | 11         | 6         | 32.39          | <b>5</b>   | <b>3</b>  | <b>24.48</b>   |
|       | 3        | 133    | 14    | 570.90  | 67        | 11       | 310.63        | <b>61</b>  | <b>8</b>  | <b>160.67</b>  | 231        | 17        | 952.05         |
|       | 4        | 109    | 12    | 489.55  | 55        | 8        | 327.99        | <b>49</b>  | <b>9</b>  | <b>153.84</b>  | 84         | 10        | 397.89         |
|       | 5        | 1      | 1     | 25.16   | 1         | 1        | 39.04         | 1          | 1         | 22.43          | <b>1</b>   | <b>1</b>  | <b>14.11</b>   |
|       | Average  | 137.80 | 8.80  | 593.95  | 117.40    | 8.60     | 628.28        | 94.40      | 9.00      | 325.79         | 142.40     | 9.00      | 576.29         |
| P9    | 1        | 1      | 1     | 51.16   | 1         | 1        | 94.92         | 1          | 1         | 29.51          | <b>1</b>   | <b>1</b>  | <b>17.93</b>   |
|       | 2        | 5      | 3     | 73.06   | 5         | 3        | 164.48        | 5          | 3         | 50.24          | <b>5</b>   | <b>3</b>  | <b>44.25</b>   |
|       | 3        | 19     | 6     | 133.93  | 13        | 4        | 178.53        | 17         | 5         | 103.98         | <b>7</b>   | <b>4</b>  | <b>44.93</b>   |
|       | 4        | 52     | 11    | 449.28  | 69        | 8        | 1007.76       | 129        | 10        | 1095.67        | <b>43</b>  | <b>8</b>  | <b>376.70</b>  |
|       | 5        | 240    | 17    | 1661.62 | 312       | 30       | 1780.65       | 350        | 22        | 1855.94        | <b>230</b> | <b>21</b> | <b>1459.78</b> |
|       | Average  | 63.40  | 7.60  | 473.81  | 80.00     | 9.20     | 645.27        | 100.40     | 8.20      | 627.07         | 57.20      | 7.40      | 388.72         |

**Table 6 Comparing objective function values of BSPRP when using branch and price (it finds optimal solutions in all instances) vs. TSP- and TRP-based routing methods with random assignments of patients to stages.**

| Problem | Instance | B&P   | TSP-based |       |         |              | TRP-based |       |         |              |
|---------|----------|-------|-----------|-------|---------|--------------|-----------|-------|---------|--------------|
|         |          |       | Min       | Max   | Gap (%) | Avg. Gap (%) | Min       | Max   | Gap (%) | Avg. Gap (%) |
| P1      | 1        | 4414  | 5050      | 5614  | 21.26   |              | 4976      | 5570  | 18.71   |              |
|         | 2        | 4924  | 5286      | 5728  | 11.07   |              | 5268      | 5640  | 9.05    |              |
|         | 3        | 4776  | 5092      | 5784  | 13.02   | 15.50        | 5090      | 5610  | 10.37   | 13.07        |
|         | 4        | 5116  | 5780      | 6280  | 17.46   |              | 5604      | 5912  | 13.69   |              |
|         | 5        | 4442  | 4866      | 5294  | 14.69   |              | 4862      | 5218  | 13.54   |              |
| P2      | 1        | 7083  | 7961      | 8557  | 17.73   |              | 7631      | 8391  | 14.20   |              |
|         | 2        | 7662  | 8612      | 9596  | 18.38   |              | 8352      | 9046  | 14.15   |              |
|         | 3        | 8704  | 9930      | 10554 | 18.79   | 17.26        | 9428      | 10338 | 14.48   | 13.56        |
|         | 4        | 7242  | 7706      | 8650  | 14.56   |              | 7692      | 8360  | 11.33   |              |
|         | 5        | 8147  | 9229      | 9875  | 16.82   |              | 9045      | 9577  | 13.66   |              |
| P3      | 1        | 10726 | 12036     | 12888 | 15.78   |              | 11966     | 12260 | 13.07   |              |
|         | 2        | 11590 | 12884     | 13572 | 13.90   |              | 12840     | 13262 | 12.16   |              |
|         | 3        | 11368 | 12674     | 13404 | 15.65   | 15.56        | 12440     | 13070 | 12.61   | 12.72        |
|         | 4        | 9688  | 10746     | 11540 | 14.84   |              | 10620     | 11114 | 12.02   |              |
|         | 5        | 11388 | 12888     | 14400 | 17.65   |              | 12796     | 13230 | 13.74   |              |
| P4      | 1        | 5378  | 6202      | 6824  | 20.83   |              | 6116      | 6492  | 17.21   |              |
|         | 2        | 6718  | 7222      | 7828  | 10.97   |              | 7194      | 7672  | 10.45   |              |
|         | 3        | 6066  | 6956      | 7564  | 19.42   | 18.34        | 6802      | 7336  | 16.41   | 15.66        |
|         | 4        | 6418  | 7324      | 8242  | 21.18   |              | 7290      | 7918  | 16.97   |              |
|         | 5        | 6320  | 7166      | 7912  | 19.28   |              | 7102      | 7740  | 17.24   |              |
| P5      | 1        | 10017 | 11185     | 12119 | 15.61   |              | 11005     | 11585 | 12.89   |              |
|         | 2        | 9793  | 10937     | 12105 | 18.93   |              | 10887     | 11703 | 15.49   |              |
|         | 3        | 9326  | 10774     | 12018 | 22.57   | 19.11        | 10476     | 11296 | 16.61   | 15.40        |
|         | 4        | 10404 | 11642     | 12770 | 17.87   |              | 11474     | 12316 | 14.56   |              |
|         | 5        | 9945  | 11771     | 12185 | 20.58   |              | 11505     | 12049 | 17.48   |              |
| P6      | 1        | 12846 | 14706     | 15600 | 17.23   |              | 14328     | 14862 | 13.43   |              |
|         | 2        | 12392 | 13930     | 14768 | 15.06   |              | 13470     | 14116 | 12.03   |              |
|         | 3        | 13368 | 14902     | 16700 | 18.77   | 18.75        | 14780     | 15746 | 14.28   | 14.42        |
|         | 4        | 13520 | 14778     | 16568 | 17.71   |              | 14632     | 15712 | 13.32   |              |
|         | 5        | 14432 | 17270     | 18694 | 24.99   |              | 16650     | 17692 | 19.04   |              |
| P7      | 1        | 7196  | 8568      | 9052  | 21.96   |              | 8360      | 8712  | 18.86   |              |
|         | 2        | 7514  | 8584      | 9194  | 18.69   |              | 8416      | 8872  | 15.39   |              |
|         | 3        | 7228  | 8528      | 9390  | 23.44   | 19.57        | 8206      | 9078  | 20.37   | 16.92        |
|         | 4        | 7022  | 7790      | 8350  | 14.87   |              | 7736      | 8158  | 13.00   |              |
|         | 5        | 7352  | 8452      | 9548  | 18.88   |              | 8338      | 8926  | 16.96   |              |
| P8      | 1        | 11290 | 13158     | 14304 | 22.82   |              | 13038     | 13962 | 19.28   |              |
|         | 2        | 10529 | 11921     | 12855 | 18.15   |              | 11797     | 12401 | 14.61   |              |
|         | 3        | 11860 | 13756     | 15756 | 25.42   | 21.94        | 13602     | 14710 | 20.04   | 17.59        |
|         | 4        | 12805 | 14919     | 15859 | 20.00   |              | 14503     | 15253 | 16.13   |              |
|         | 5        | 11150 | 13440     | 14106 | 23.34   |              | 12778     | 13500 | 17.88   |              |
| P9      | 1        | 15816 | 18430     | 19762 | 20.86   |              | 18126     | 19012 | 17.57   |              |
|         | 2        | 15504 | 17326     | 18760 | 16.38   |              | 17102     | 17954 | 13.30   |              |
|         | 3        | 16036 | 18610     | 20482 | 22.42   | 19.34        | 18274     | 19378 | 17.60   | 15.30        |
|         | 4        | 16064 | 18324     | 19410 | 17.20   |              | 17742     | 18514 | 13.51   |              |
|         | 5        | 14726 | 16734     | 18214 | 19.86   |              | 16490     | 17198 | 14.55   |              |

**Table 7 Comparing objective function values of BSPRP when using branch and price (it finds optimal solutions in all instances) vs. the two-phase procedure with exact solution of each phase.**

| K | $\kappa$ | Patients | Instances | B&P   | Two-Phase Procedure |         |           |         | Avg. Gap(%) |           |
|---|----------|----------|-----------|-------|---------------------|---------|-----------|---------|-------------|-----------|
|   |          |          |           |       | TSP-based           | Gap (%) | TRP-based | Gap (%) | TSP-based   | TRP-based |
| 4 | 4        | 20       | 1         | 4459  | 5068                | 13.66   | 4950      | 11.01   | 15.60       | 13.41     |
|   |          |          | 2         | 4523  | 5174                | 14.39   | 4976      | 10.02   |             |           |
|   |          |          | 3         | 4346  | 5066                | 16.57   | 4998      | 15.00   |             |           |
|   |          |          | 4         | 4743  | 5294                | 11.62   | 5218      | 10.01   |             |           |
|   |          |          | 5         | 4084  | 4972                | 21.74   | 4942      | 21.01   |             |           |
| 4 | 5        | 25       | 1         | 6578  | 8010                | 21.77   | 7631      | 16.01   | 17.32       | 14.01     |
|   |          |          | 2         | 7531  | 8129                | 7.94    | 8360      | 11.01   |             |           |
|   |          |          | 3         | 6562  | 8479                | 29.21   | 7875      | 20.01   |             |           |
|   |          |          | 4         | 7201  | 7961                | 10.55   | 7850      | 9.01    |             |           |
|   |          |          | 5         | 7175  | 8403                | 17.11   | 8180      | 14.01   |             |           |
| 5 | 5        | 30       | 1         | 9756  | 10902               | 11.75   | 10732     | 10.00   | 18.14       | 15.21     |
|   |          |          | 2         | 9592  | 10988               | 14.55   | 10936     | 14.01   |             |           |
|   |          |          | 3         | 8973  | 10774               | 20.07   | 10678     | 19.00   |             |           |
|   |          |          | 4         | 9015  | 11056               | 22.64   | 10887     | 20.77   |             |           |
|   |          |          | 5         | 9555  | 11626               | 21.67   | 10728     | 12.28   |             |           |
| 5 | 6        | 35       | 1         | 11852 | 14372               | 21.26   | 13630     | 15.00   | 14.87       | 11.80     |
|   |          |          | 2         | 12836 | 13930               | 8.52    | 13992     | 9.01    |             |           |
|   |          |          | 3         | 12425 | 14286               | 14.98   | 13792     | 11.00   |             |           |
|   |          |          | 4         | 12589 | 14040               | 11.53   | 13974     | 11.00   |             |           |
|   |          |          | 5         | 11920 | 14072               | 18.05   | 13470     | 13.00   |             |           |
| 6 | 5        | 35       | 1         | 10923 | 11921               | 9.14    | 11797     | 8.00    | 18.47       | 15.21     |
|   |          |          | 2         | 10180 | 12451               | 22.31   | 12115     | 19.01   |             |           |
|   |          |          | 3         | 9895  | 12445               | 25.77   | 11875     | 20.01   |             |           |
|   |          |          | 4         | 10898 | 12309               | 12.95   | 12097     | 11.00   |             |           |
|   |          |          | 5         | 10509 | 12841               | 22.19   | 12401     | 18.00   |             |           |
| 6 | 6        | 40       | 1         | 15434 | 17846               | 15.63   | 16978     | 10.00   | 18.32       | 13.20     |
|   |          |          | 2         | 13857 | 16976               | 22.51   | 16490     | 19.00   |             |           |
|   |          |          | 3         | 14625 | 17752               | 21.38   | 16966     | 16.01   |             |           |
|   |          |          | 4         | 15634 | 18124               | 15.93   | 17198     | 10.00   |             |           |
|   |          |          | 5         | 15232 | 17690               | 16.14   | 16908     | 11.00   |             |           |
